# Supplementary material for: Genome-wide association studies for yield-related traits in soft red winter wheat grown in Virginia
Source: PubMed Central journal article supplement (PMC6386437; doi:10.1371/journal.pone.0208217), 2019-02-22

## Genome-wide association studies for yield-related traits in soft red winter wheat grown in Virginia

Brian P. Ward, Frederic L. Kolb, David A. Van Sanford, Gina Brown-Guedira, Priyanka Tyagi, Clay H. Sneller, and Carl A. Griffey

### **S1 File. Manhattan and QQ plots for SNP p-values generated by the GCTA leave-one-chromosome-out method.**

Below are Manhattan and uniform distribution quantile-quantile (QQ) plots produced from the output of a GWAS analysis performed using the leave-one-chromosome-out (LOCO) mixed linear model method in GCTA.

A total of 29,949 genotyping-by-sequencing (GBS) generated markers were included in the analysis.

A false-discovery rate (FDR) threshold was used to determine significance for individual SNP p-values. A horizontal line is placed on the Manhattan plot only if at least one SNP's  $-\log(p)$  value exceeds the FDR threshold.

### Manhattan and QQ plots for trait FLSG

No SNP adjusted p-values exceed the FDR threshold of 0.05

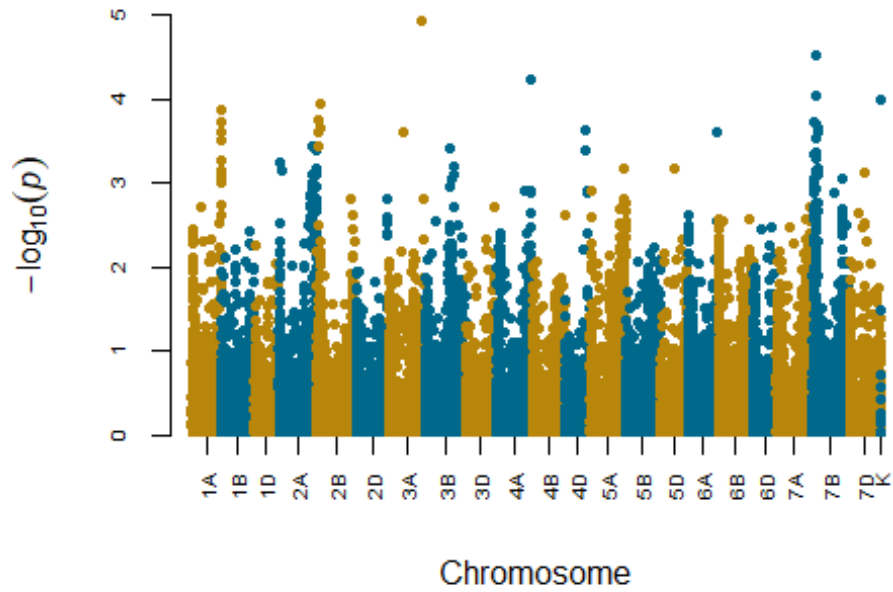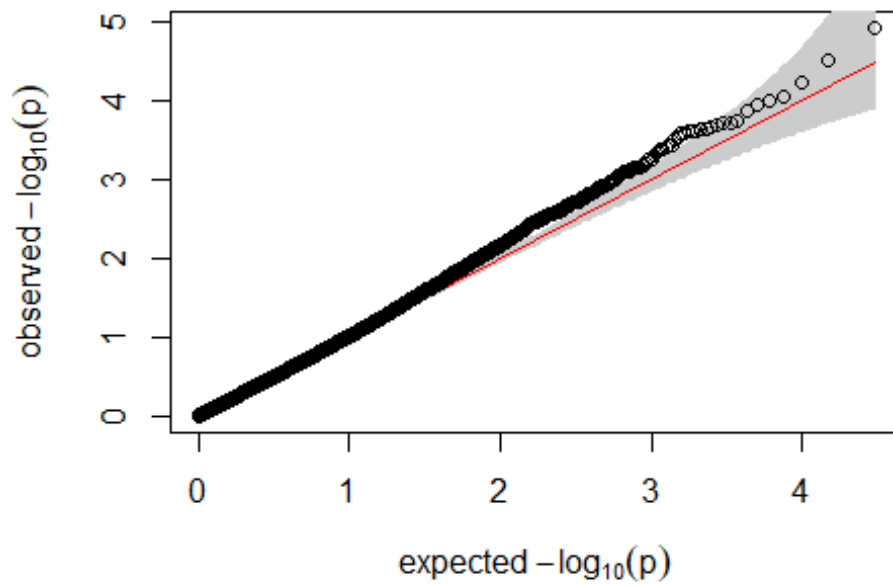

### Manhattan and QQ plots for trait GSQM

No SNP adjusted p-values exceed the FDR threshold of 0.05

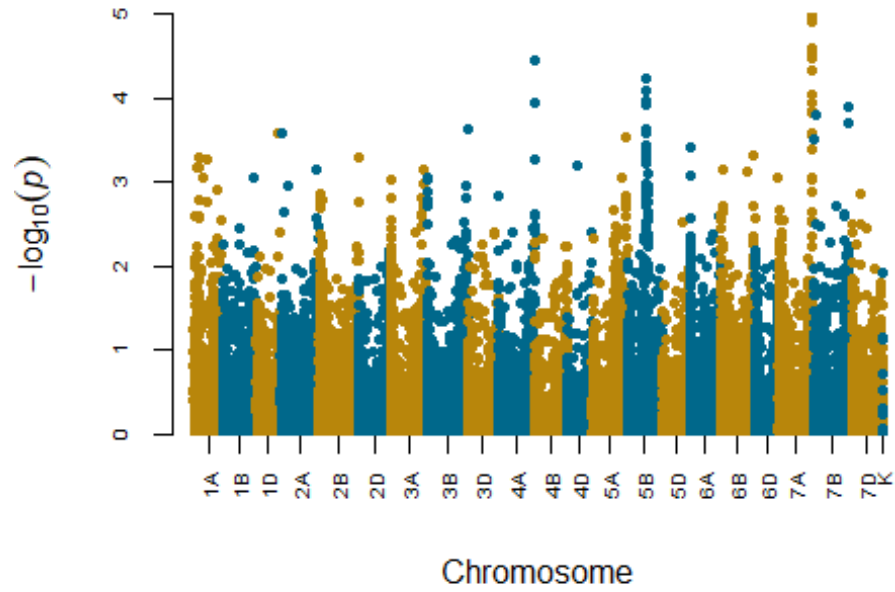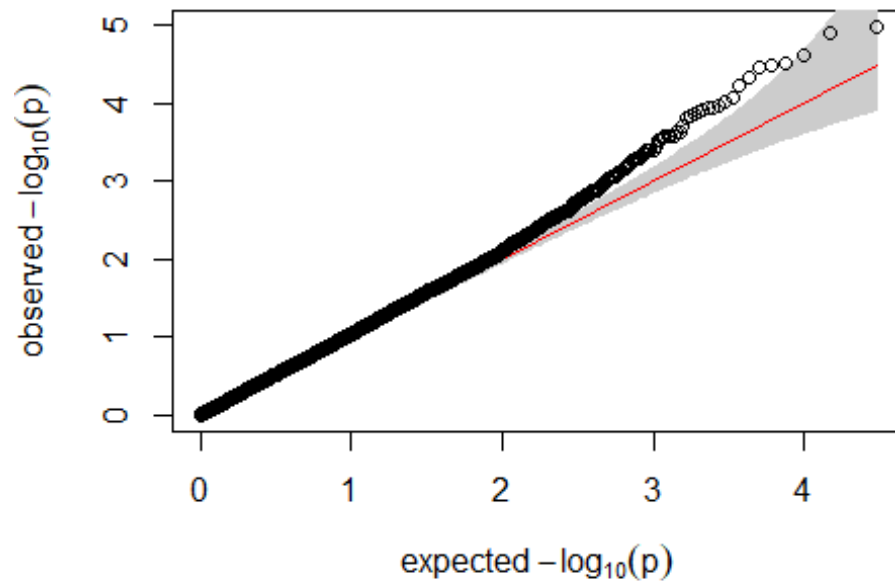

### Manhattan and QQ plots for trait GW

No SNP adjusted p-values exceed the FDR threshold of 0.05

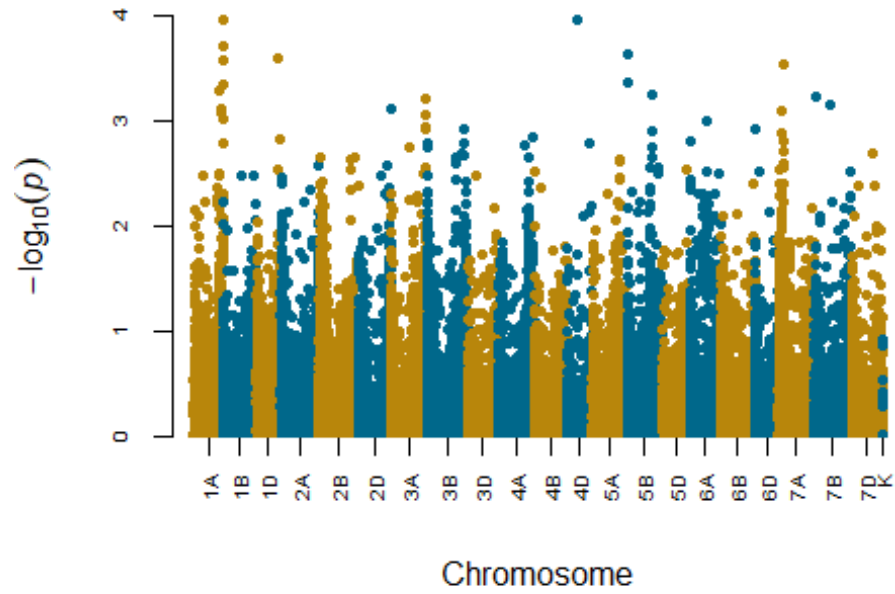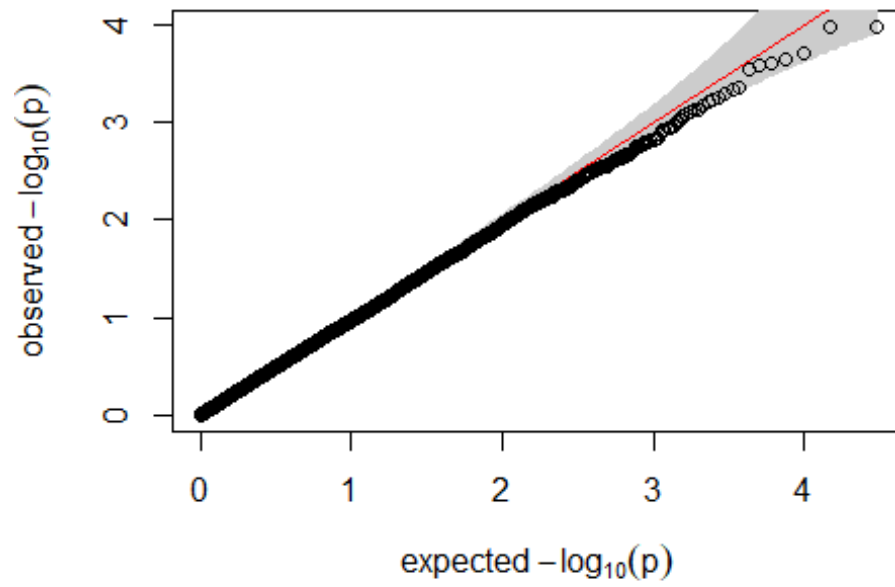

## Manhattan and QQ plots for trait HD

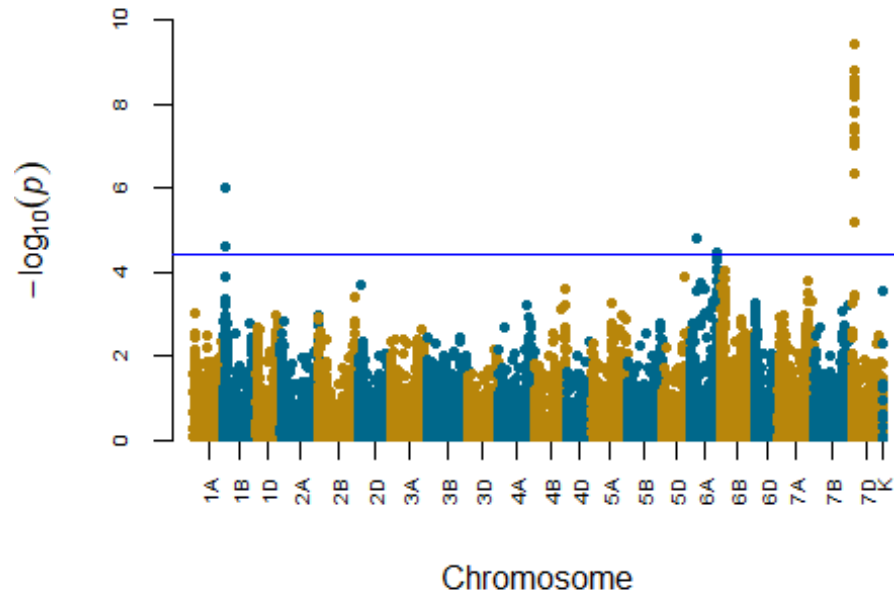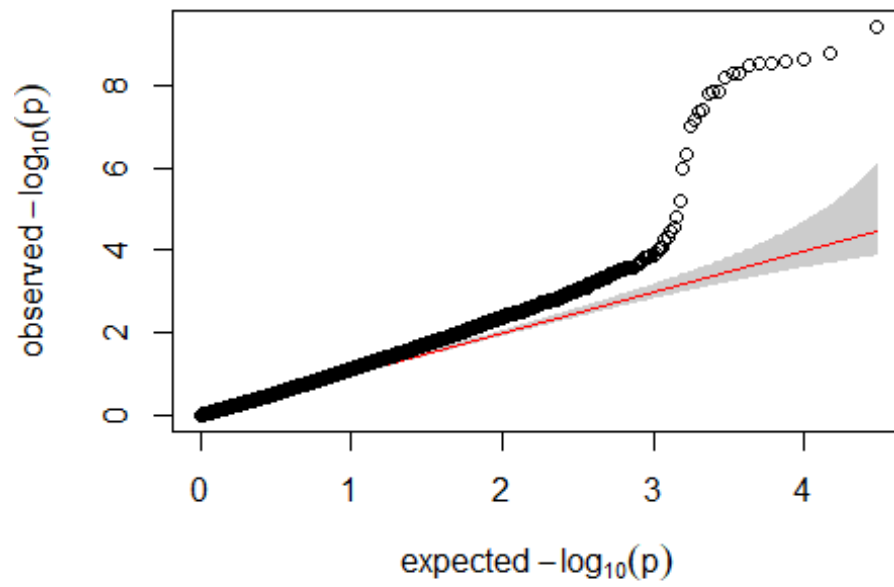

## Manhattan and QQ plots for trait HT

No SNP adjusted p-values exceed the FDR threshold of 0.05

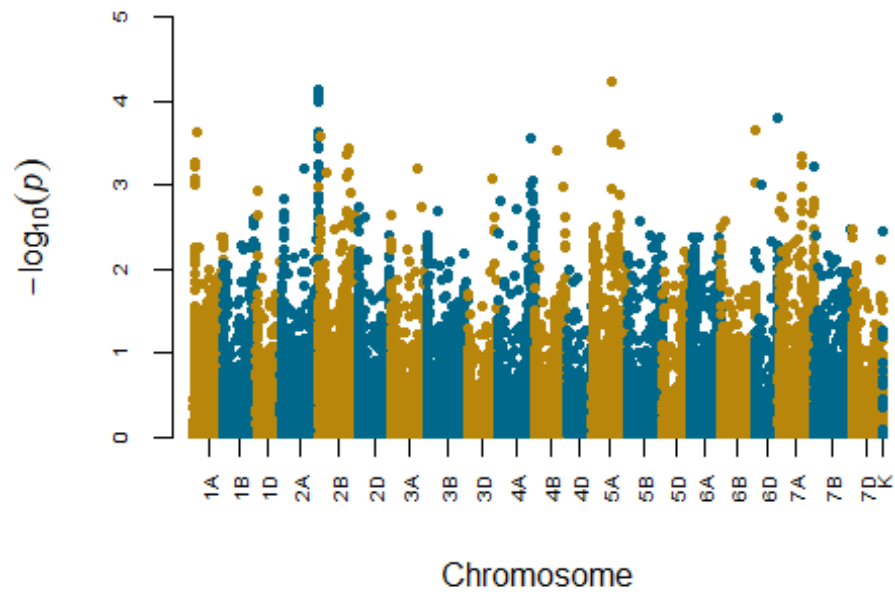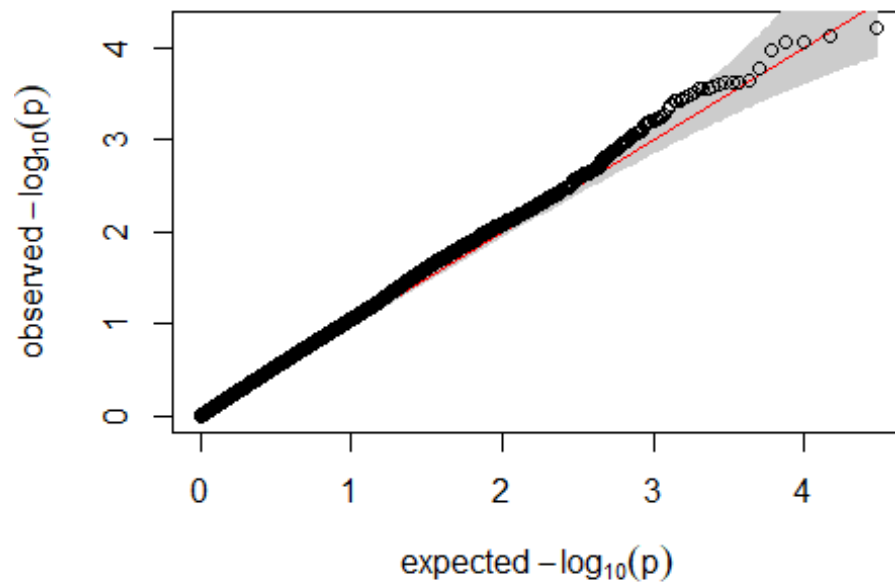

## Manhattan and QQ plots for trait MAT

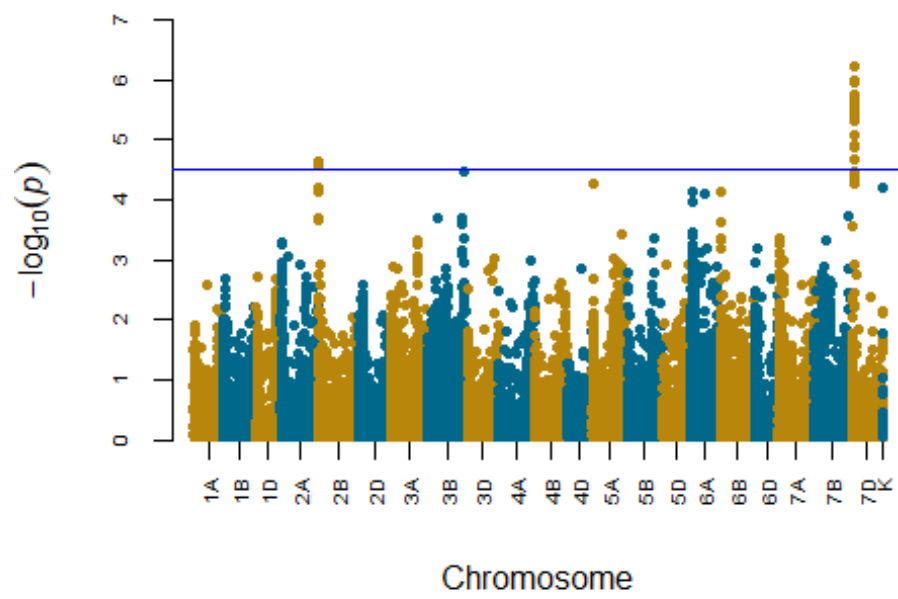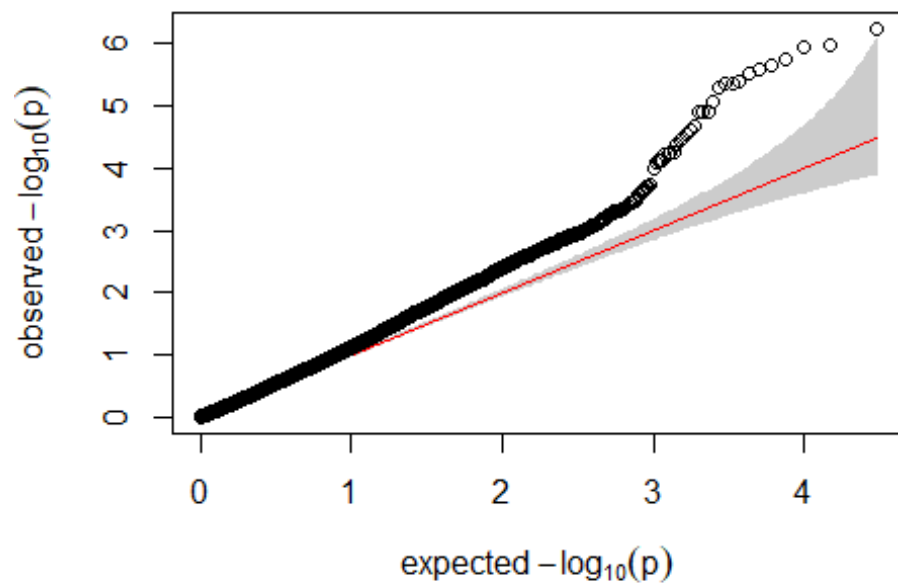

## Manhattan and QQ plots for trait NDVI

No SNP adjusted p-values exceed the FDR threshold of 0.05

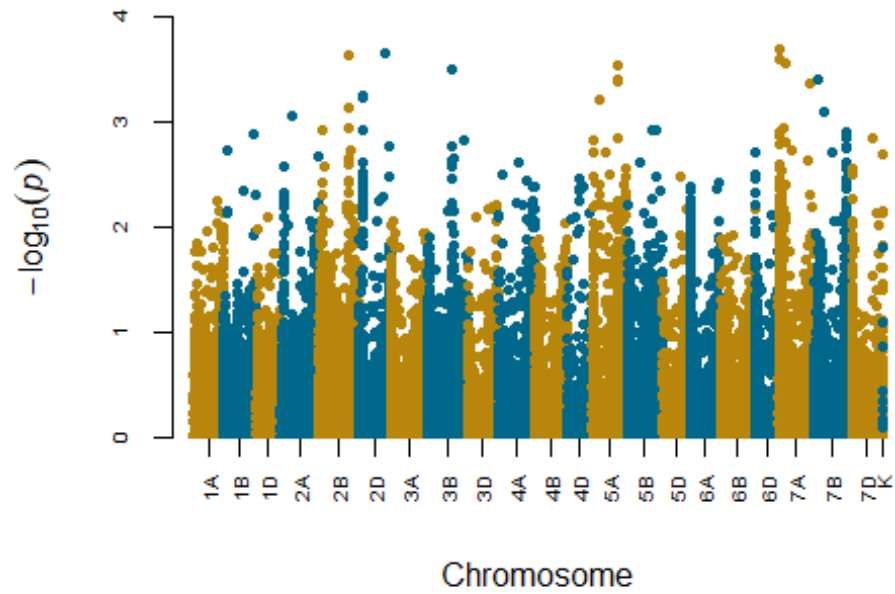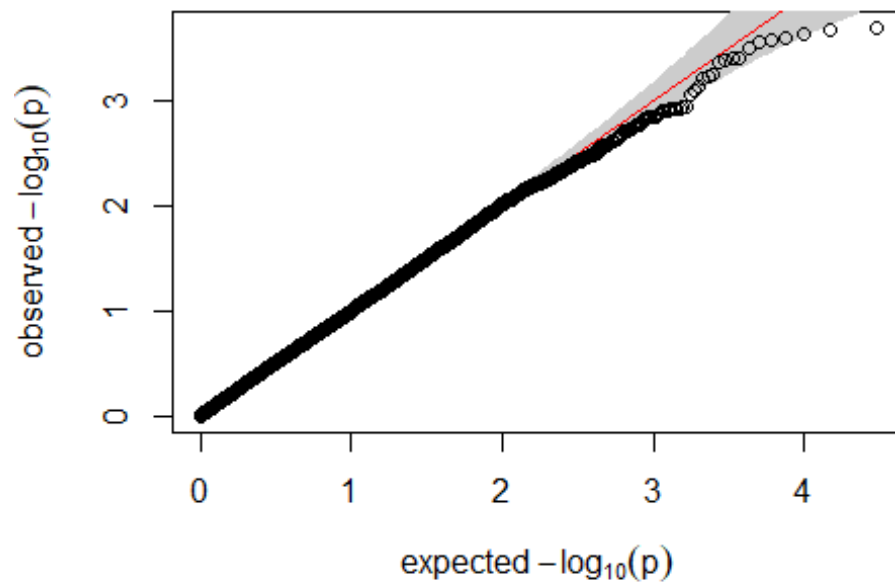



## Manhattan and QQ plots for trait PROT

No SNP adjusted p-values exceed the FDR threshold of 0.05

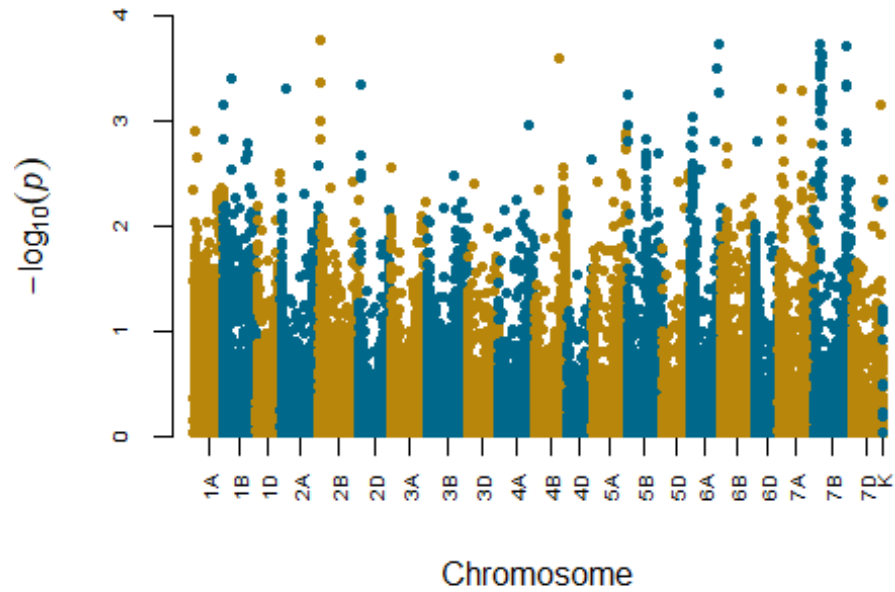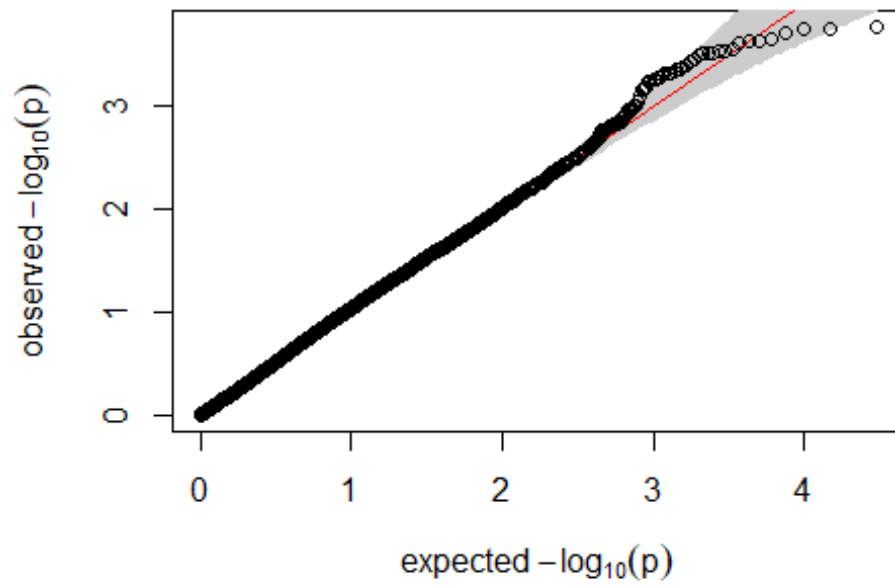

### Manhattan and QQ plots for trait SPH

No SNP adjusted p-values exceed the FDR threshold of 0.05

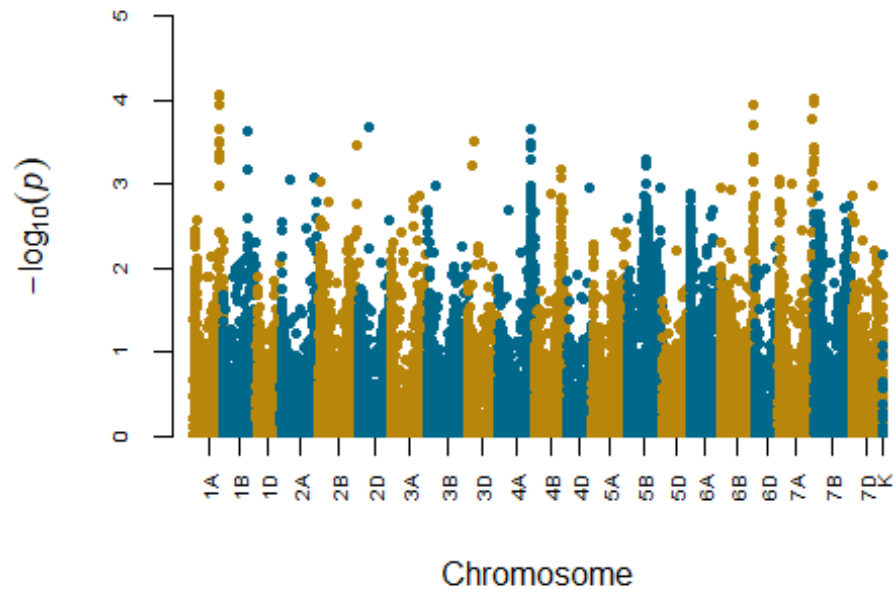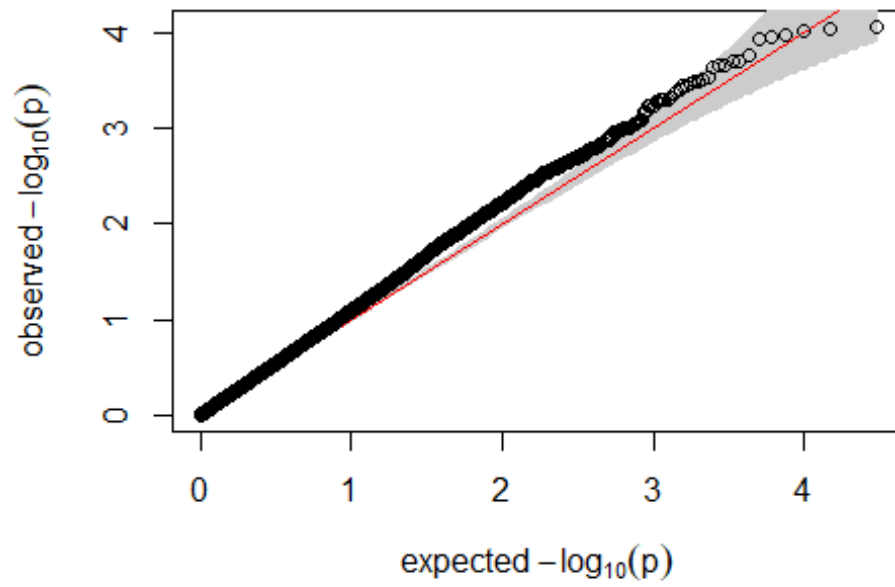

## Manhattan and QQ plots for trait SSQM

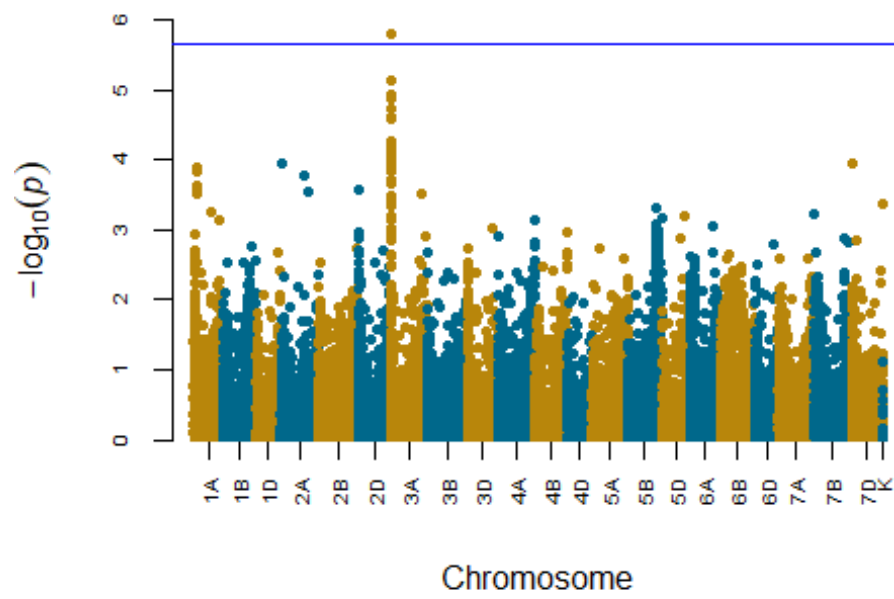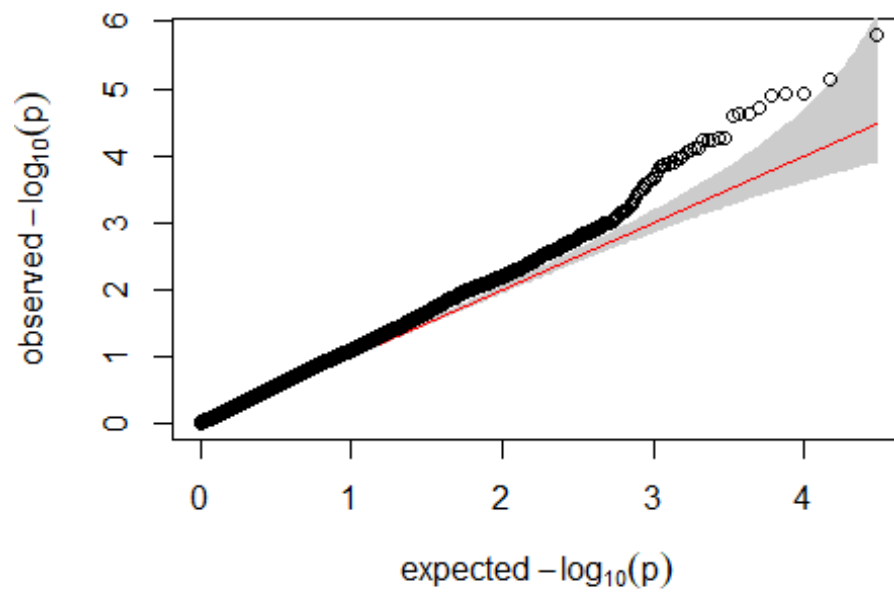

### Manhattan and QQ plots for trait STARCH

No SNP adjusted p-values exceed the FDR threshold of 0.05

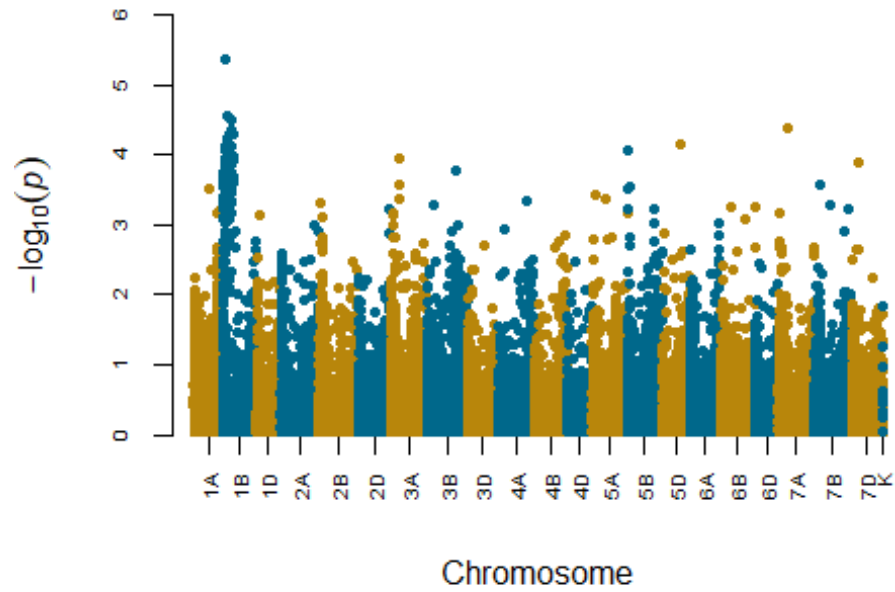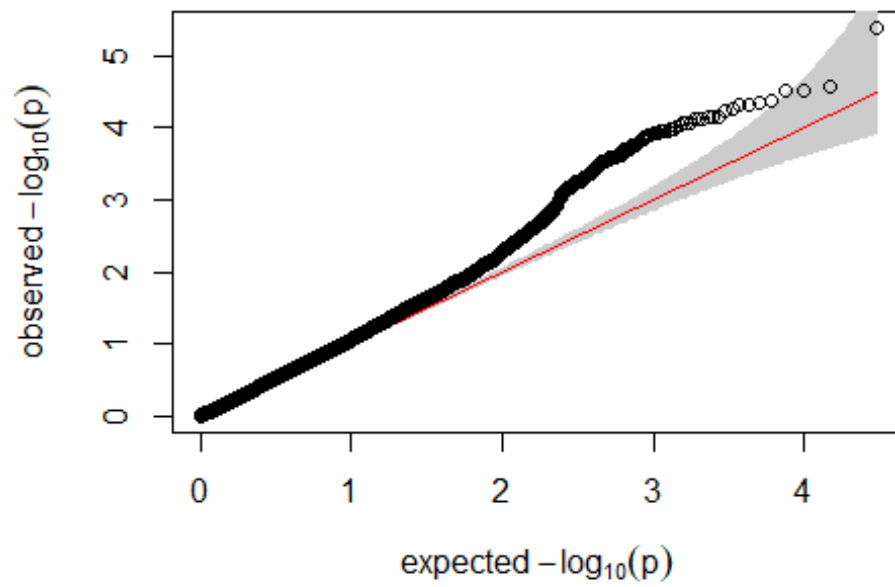

## Manhattan and QQ plots for trait TKW

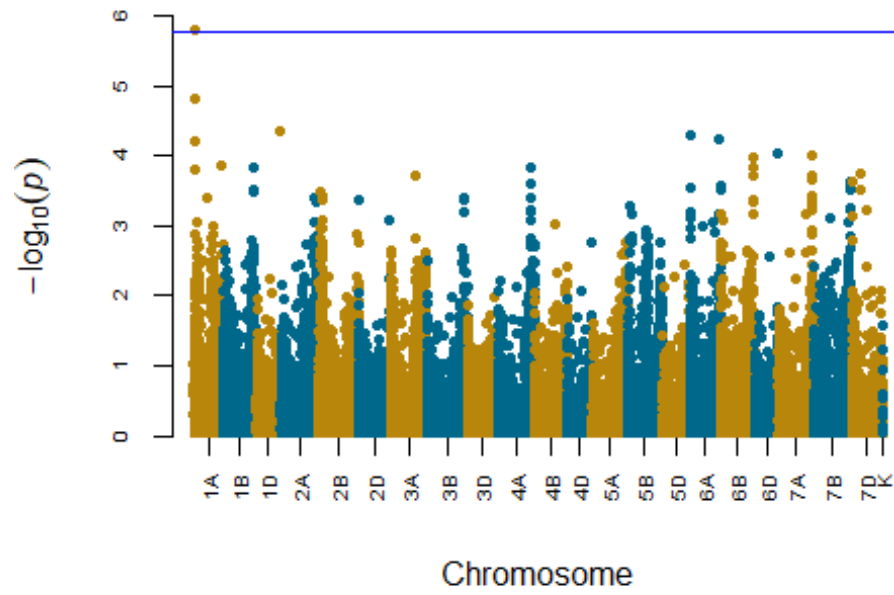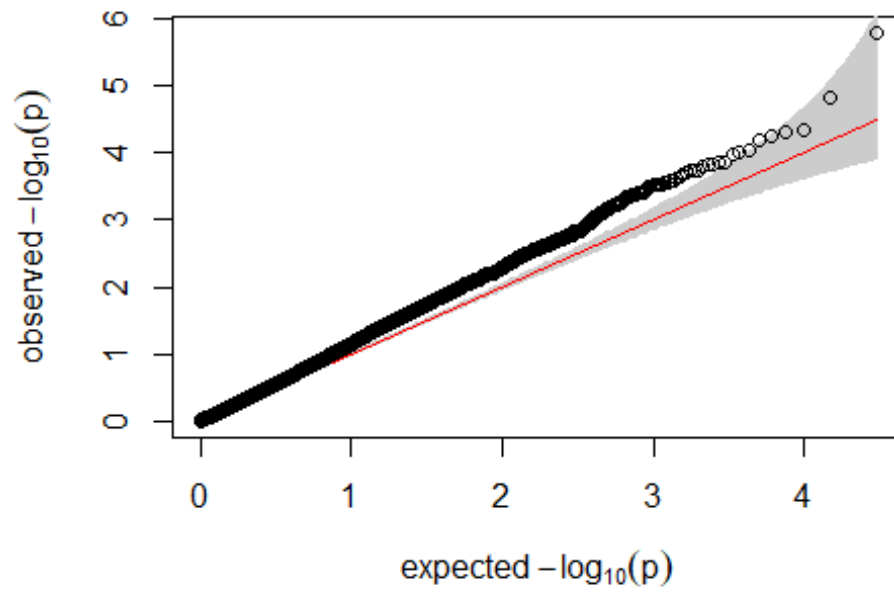

## Manhattan and QQ plots for trait TWT

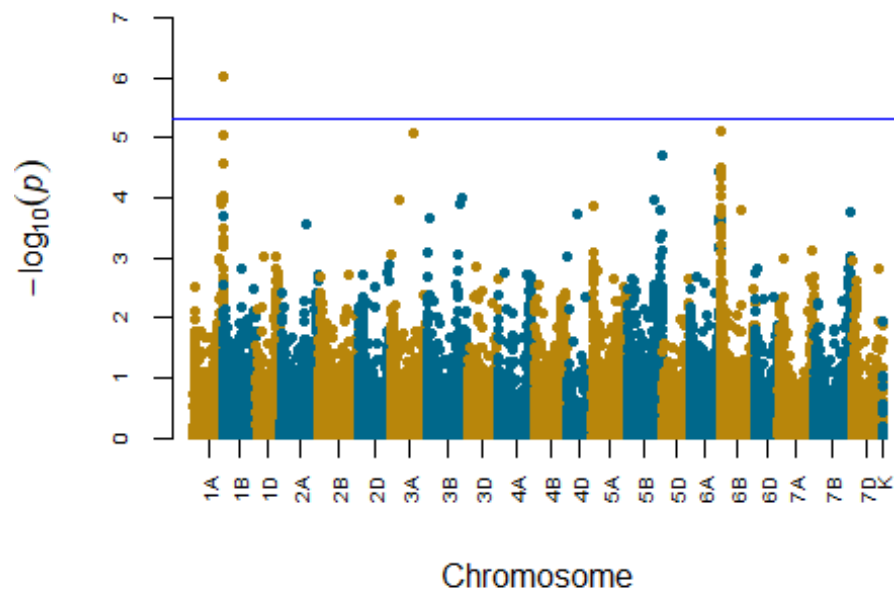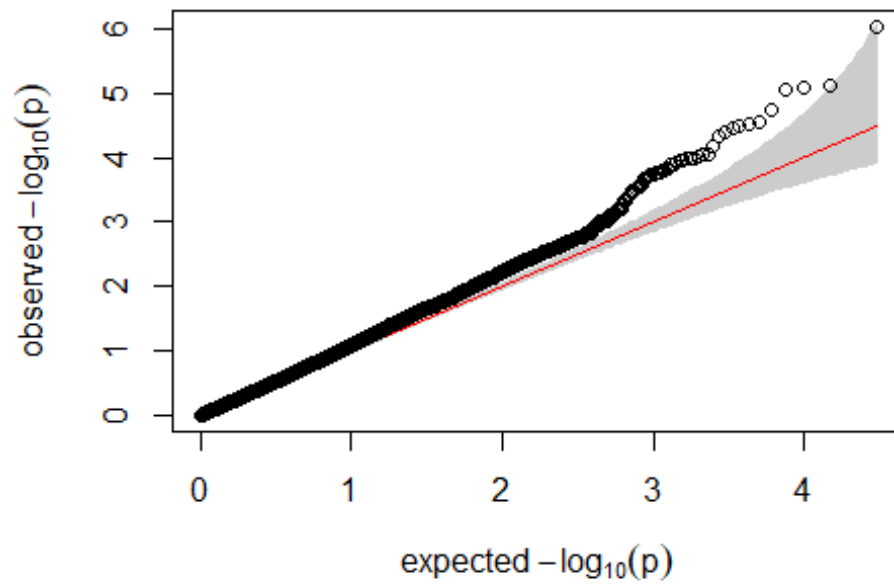

### Manhattan and QQ plots for trait YLD

No SNP adjusted p-values exceed the FDR threshold of 0.05

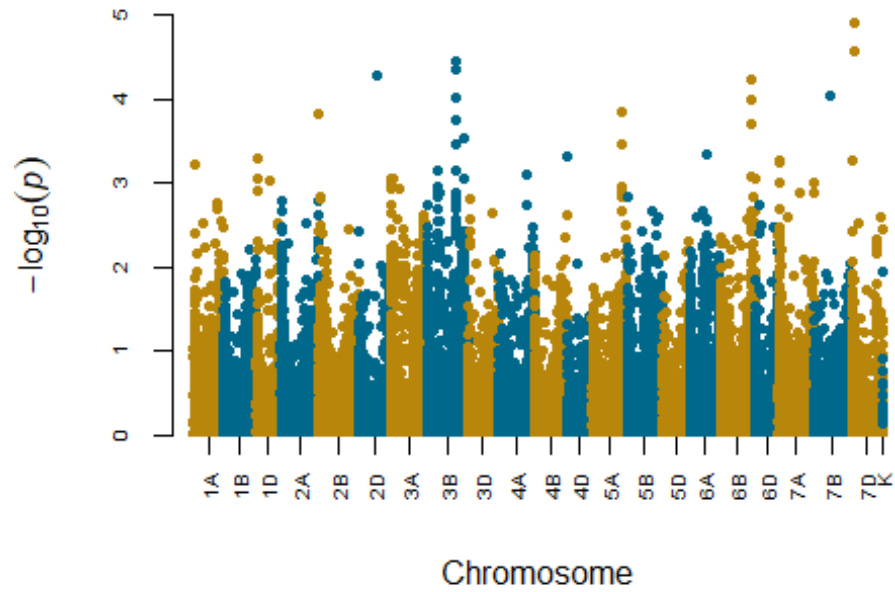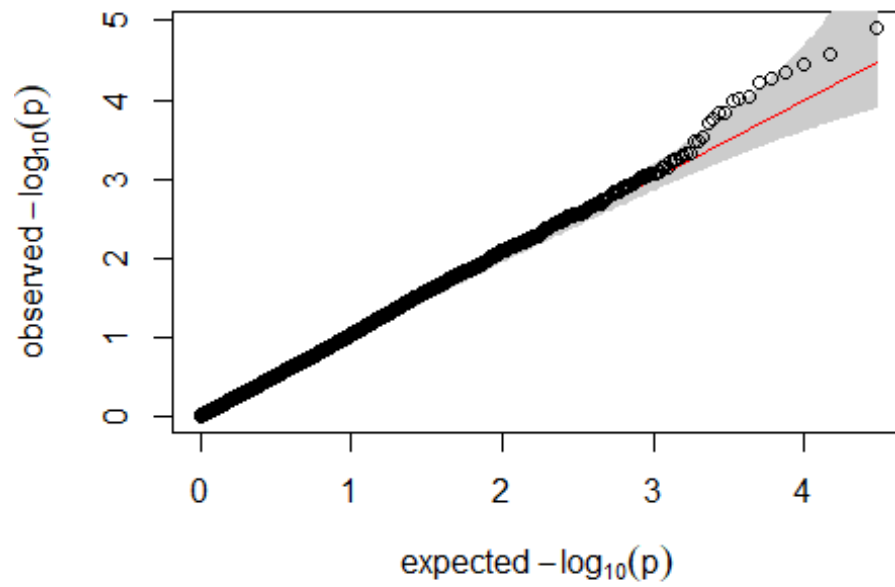

Supplement: pone.0208217.s008.pdf [file pone.0208217.s008.pdf]
