# Supplementary material for: Genome-wide association studies for yield-related traits in soft red winter wheat grown in Virginia
Source: PubMed Central journal article supplement (PMC6386437; doi:10.1371/journal.pone.0208217), 2019-02-22

## Genome-wide association studies for yield-related traits in soft red winter wheat grown in Virginia

Brian P. Ward, Frederic L. Kolb, David A. Van Sanford, Gina Brown-Guedira, Priyanka Tyagi, Clay H. Sneller, and Carl A. Griffey

### **S2 File. Manhattan and QQ plots for SNP p-values generated by the FarmCPU algorithm.**

Below are Manhattan and uniform distribution quantile-quantile (QQ) plots produced from the output of a GWAS analysis performed using the FarmCPU algorithm.

A total of 29,949 genotyping-by-sequencing (GBS) generated markers were included in the analysis.

A false-discovery rate (FDR) threshold was used to determine significance for individual SNP p-values. A horizontal line is placed on the Manhattan plot only if at least one SNP's  $-\log(p)$  value exceeds the FDR threshold.

# Manhattan and QQ plots for trait FLSG

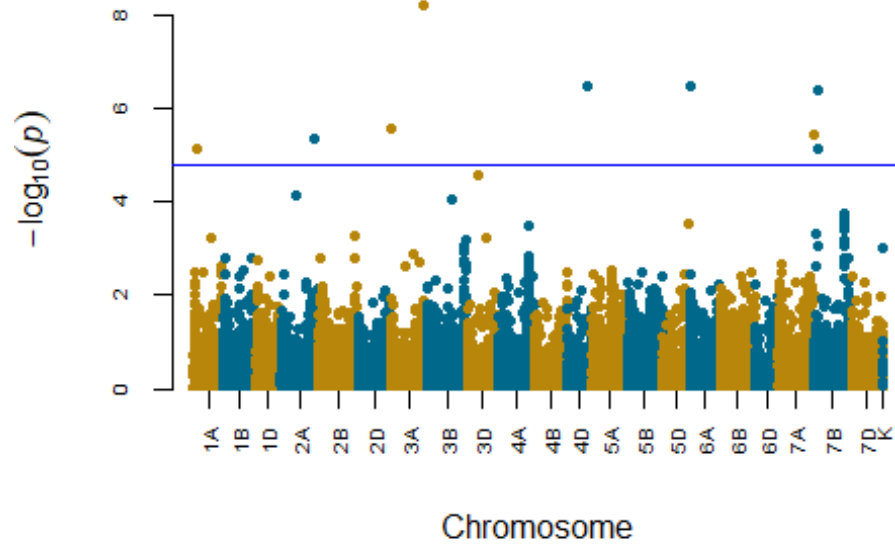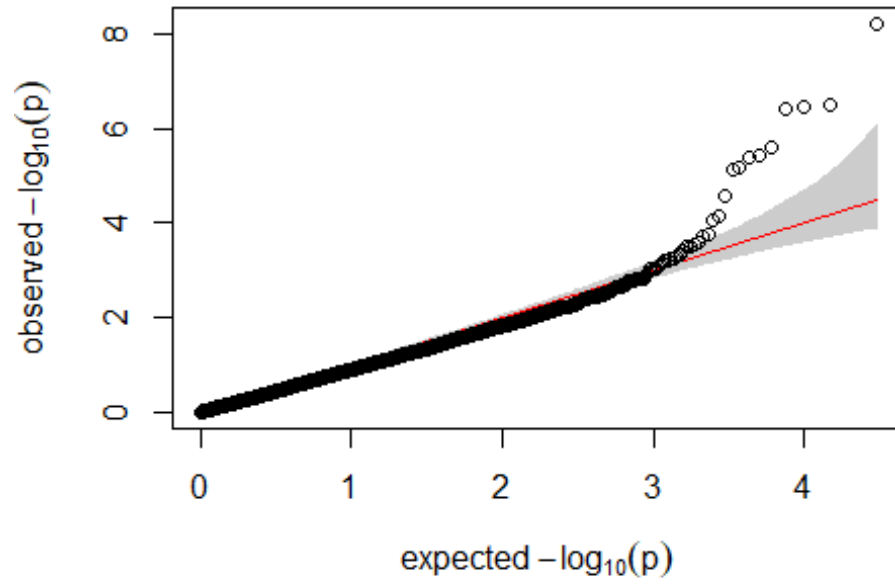

## Manhattan and QQ plots for trait GSQM

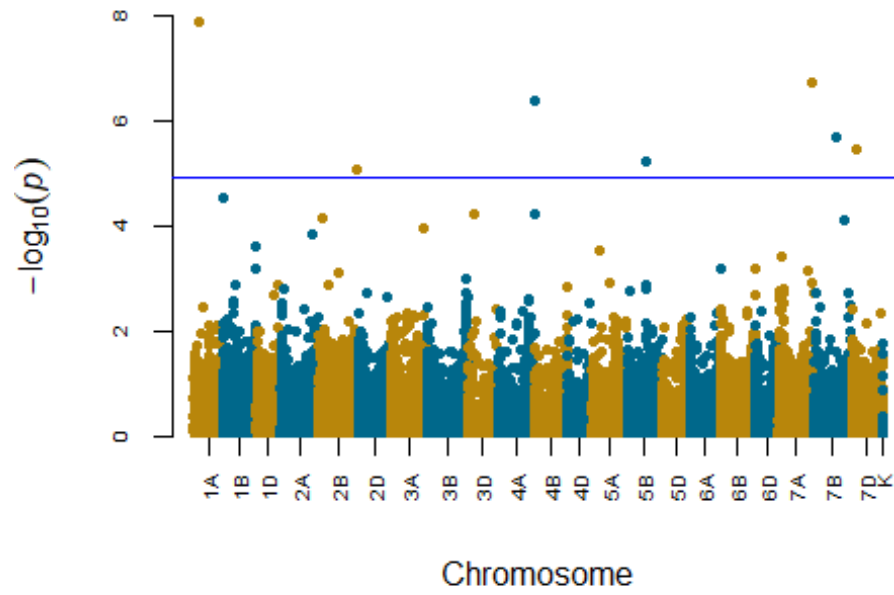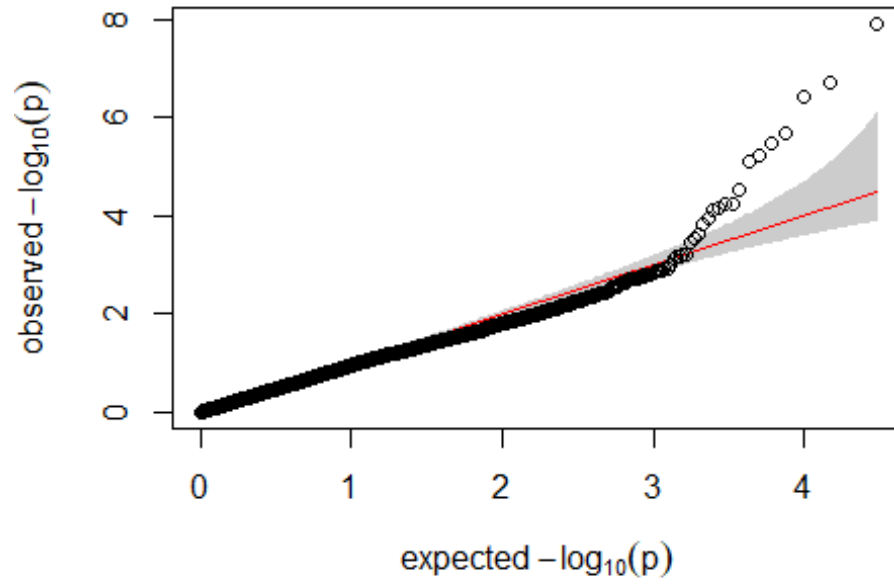

# Manhattan and QQ plots for trait GW

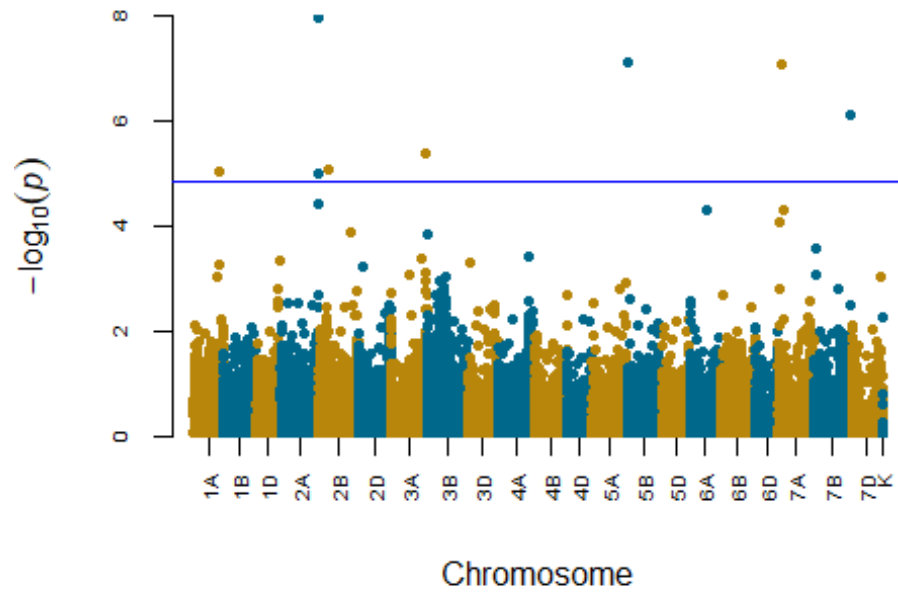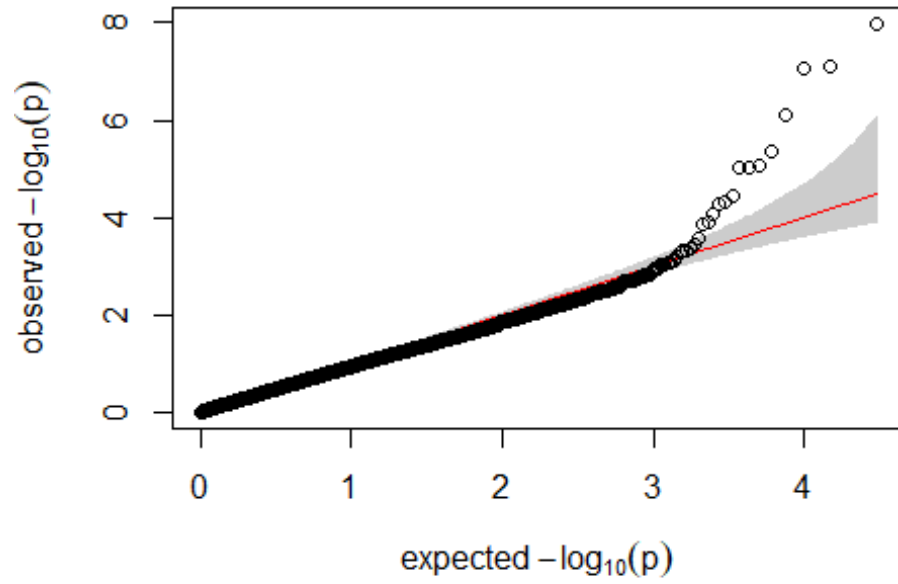

## Manhattan and QQ plots for trait HD

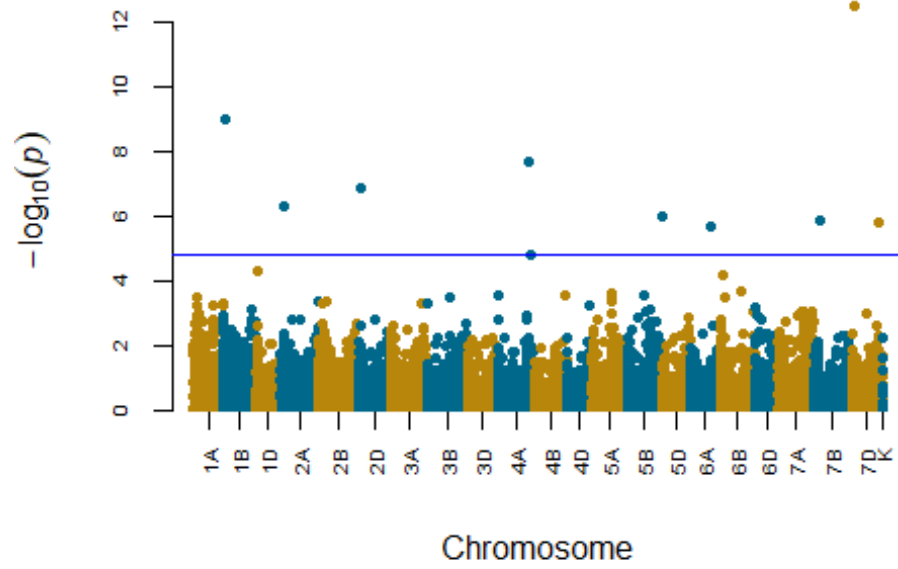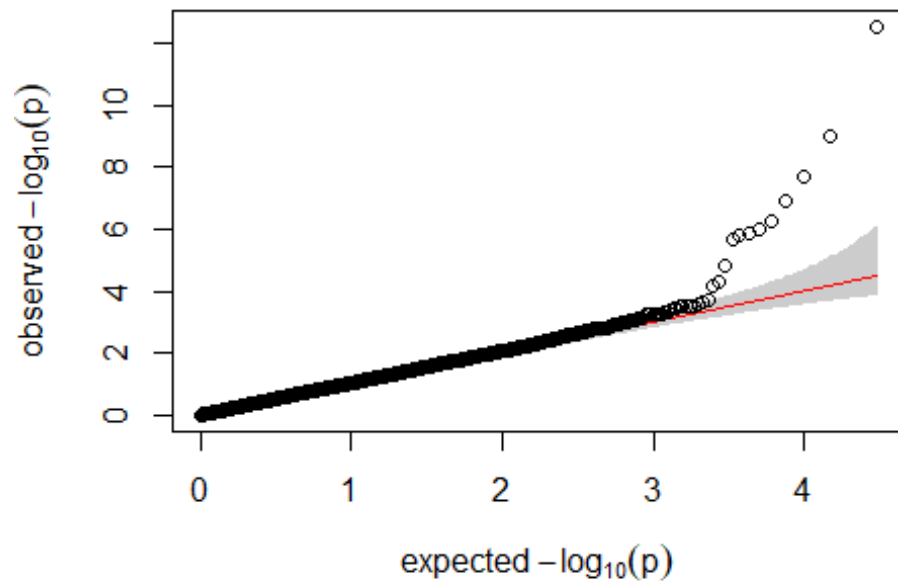

## Manhattan and QQ plots for trait HT

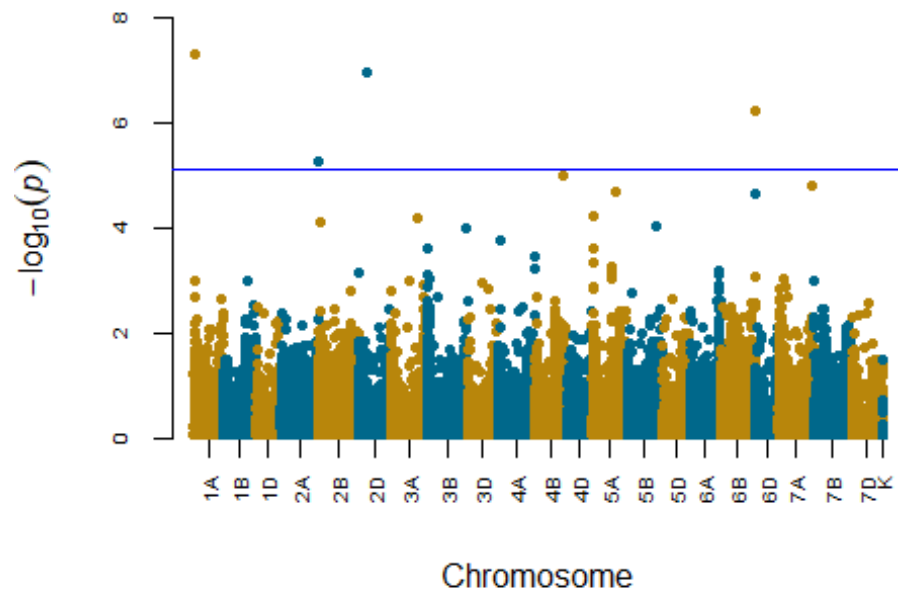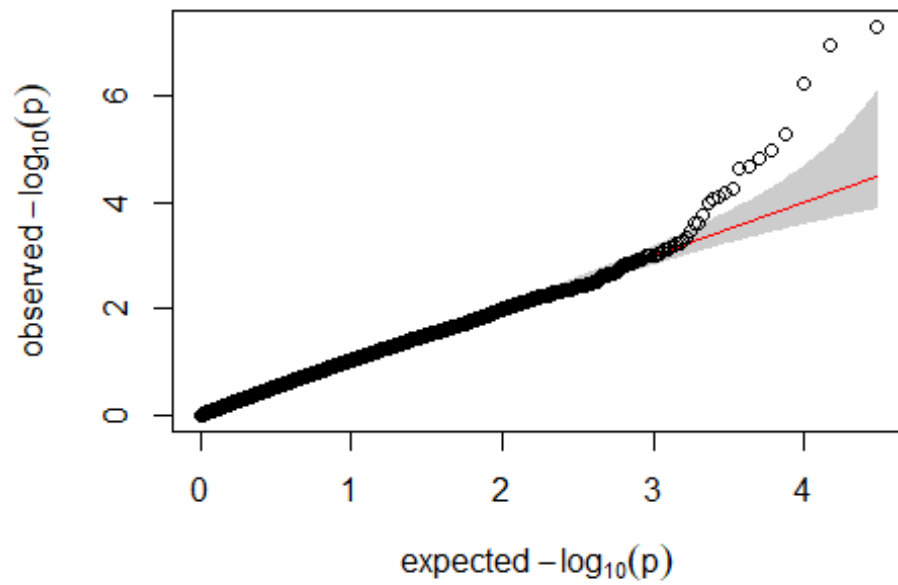

## Manhattan and QQ plots for trait MAT

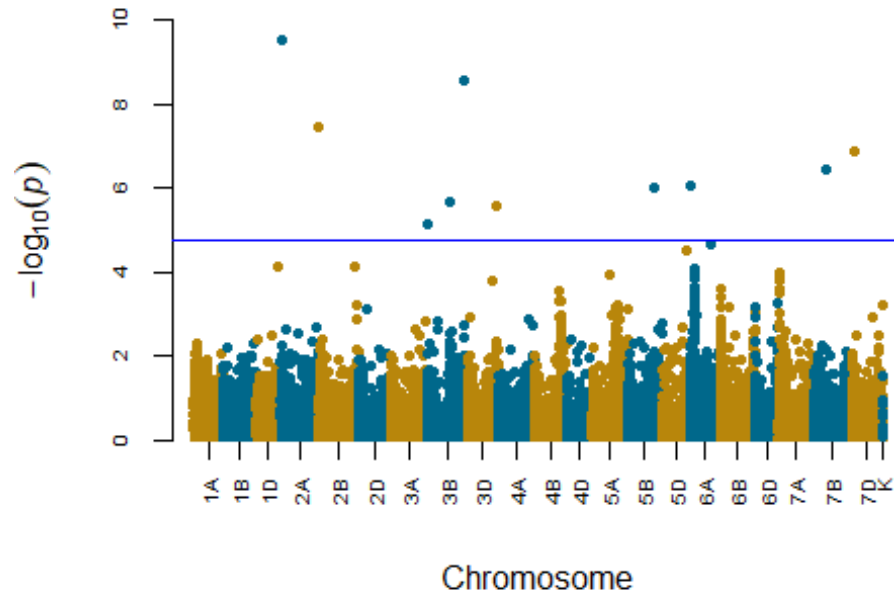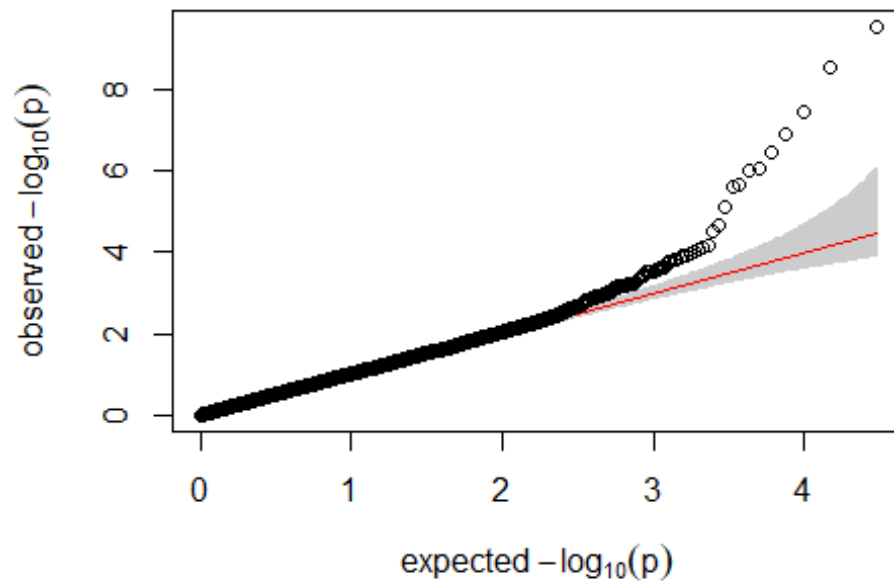

## Manhattan and QQ plots for trait NDVI

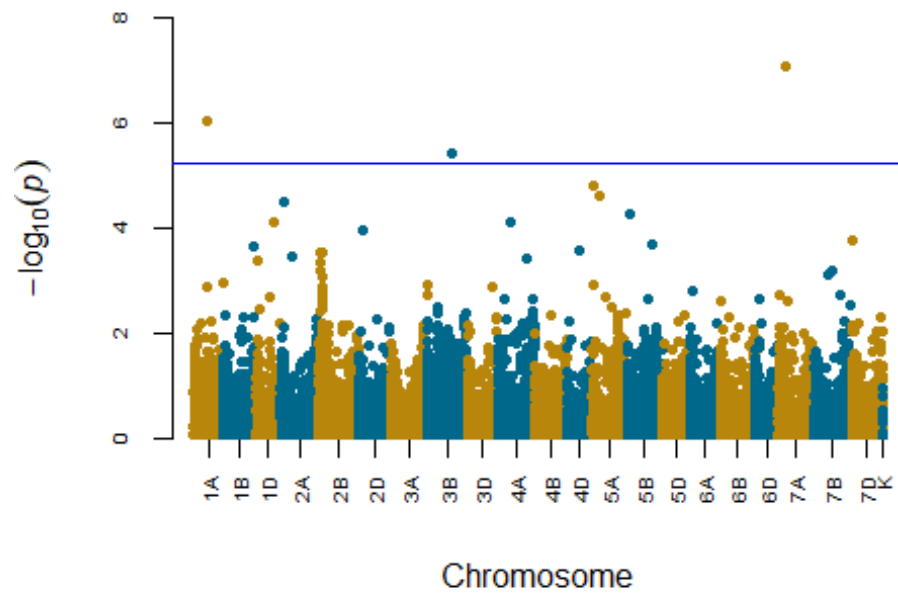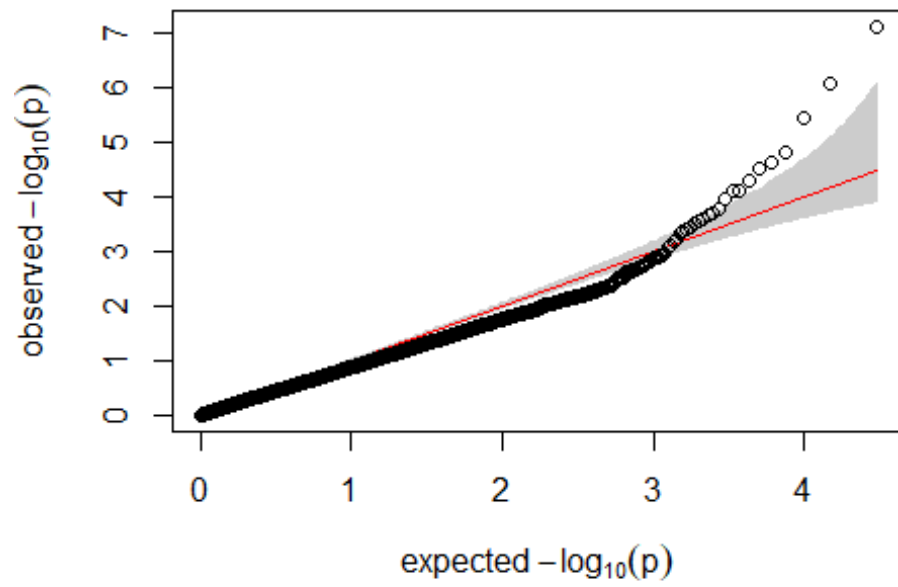



# Manhattan and QQ plots for trait PROT

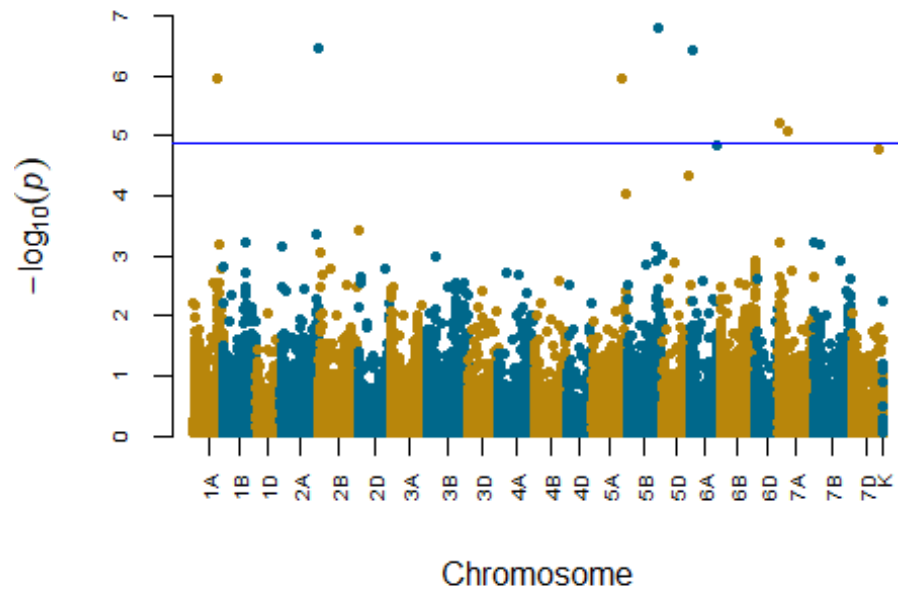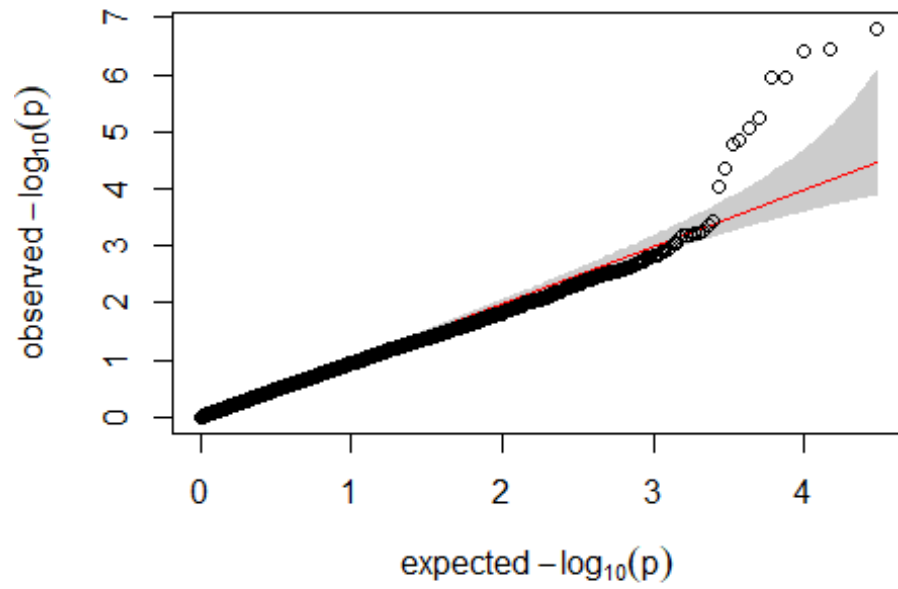

## Manhattan and QQ plots for trait SPH

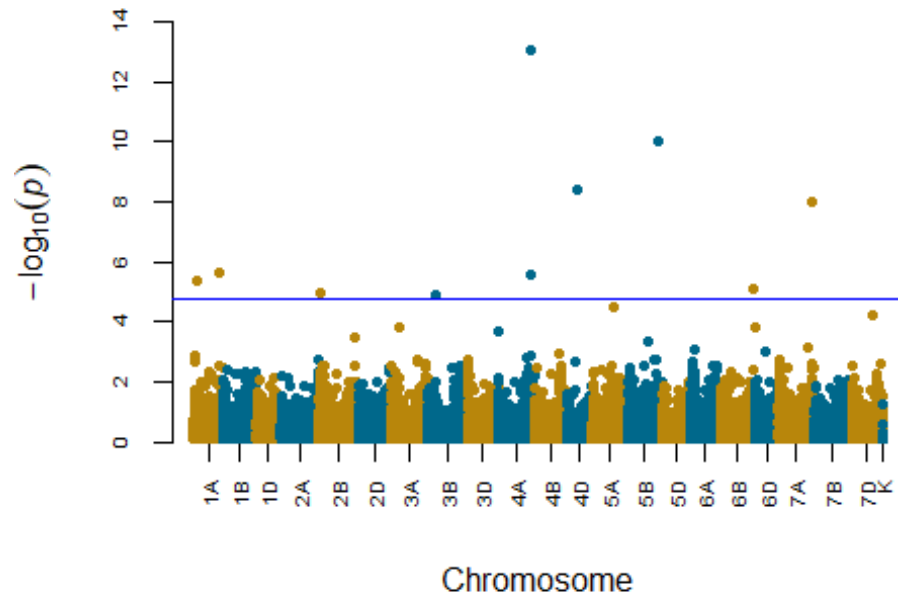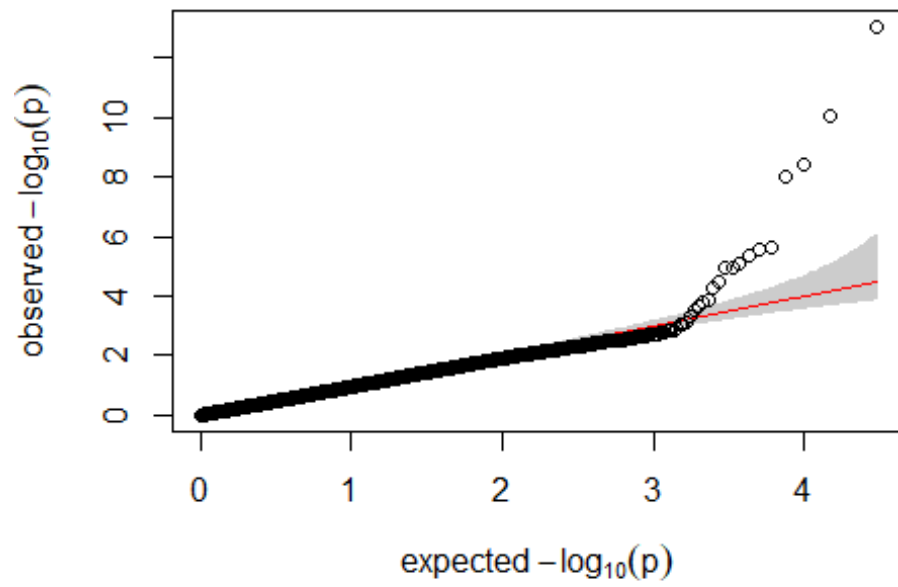

# Manhattan and QQ plots for trait SSQM

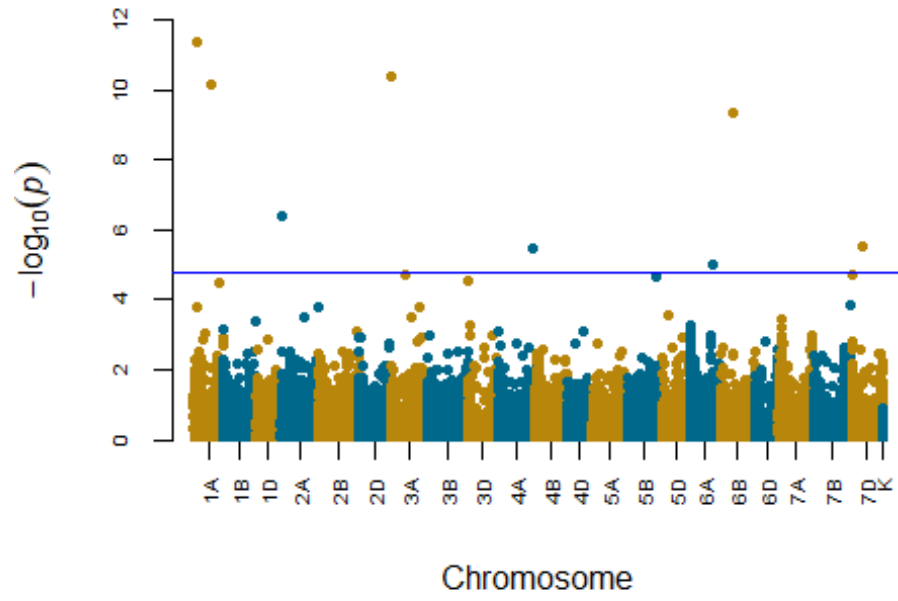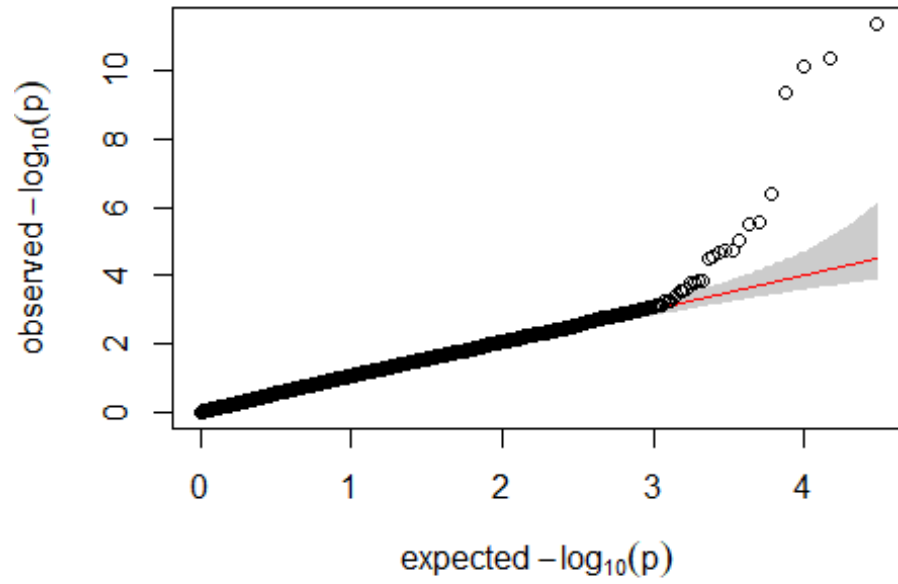

## Manhattan and QQ plots for trait STARCH

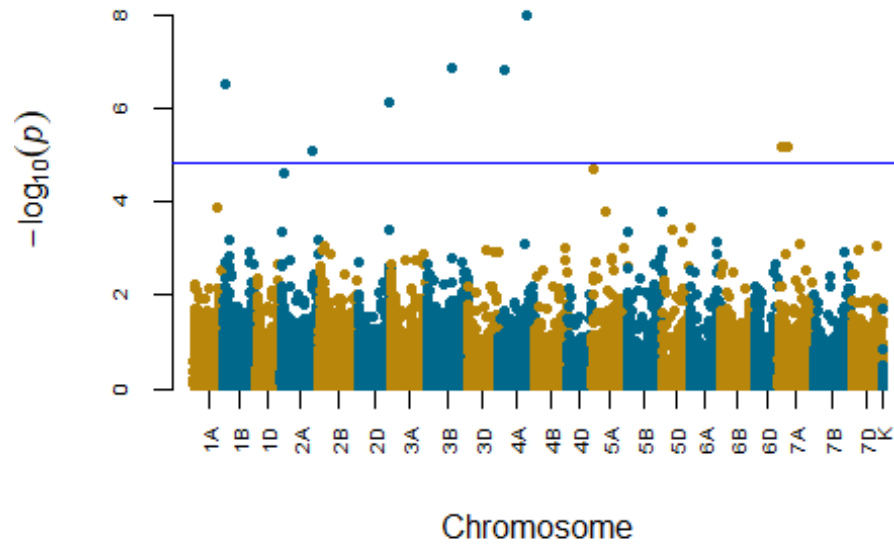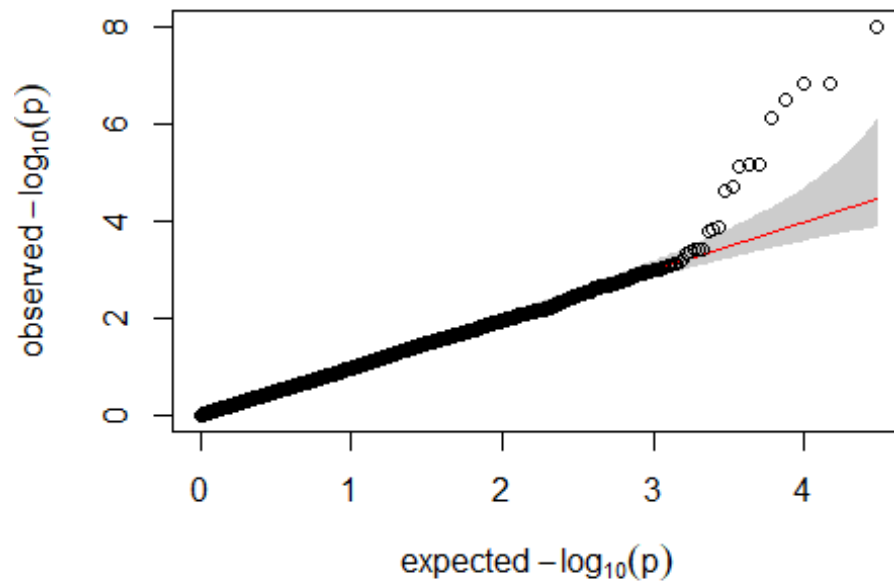

## Manhattan and QQ plots for trait TKW

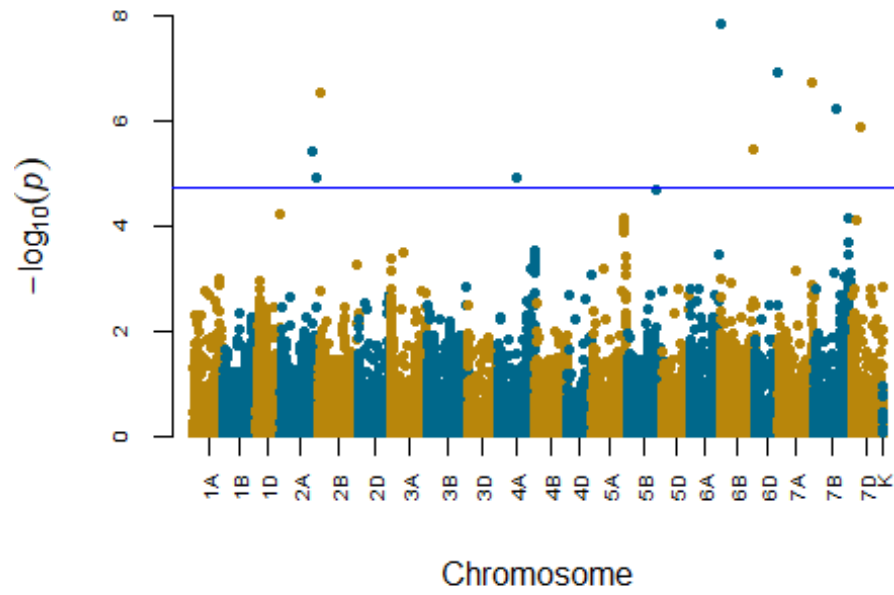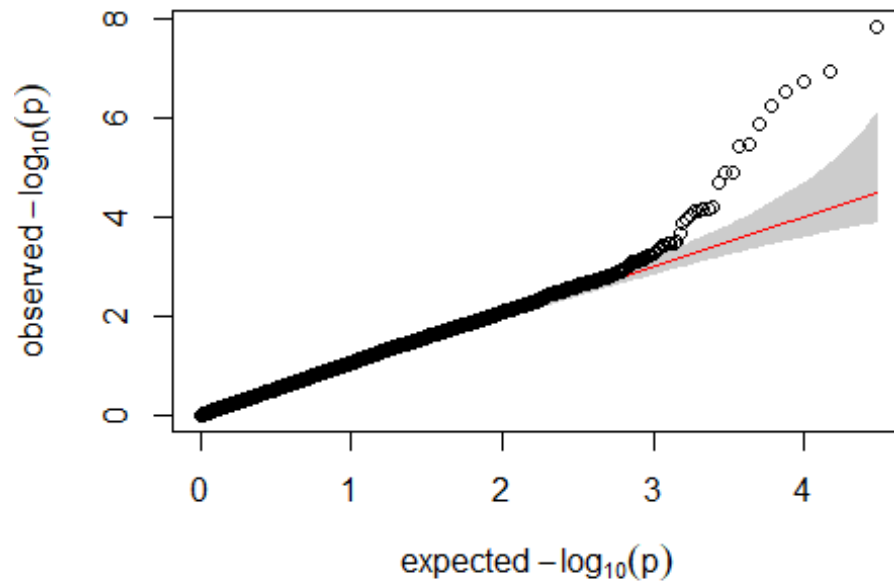

## Manhattan and QQ plots for trait TWT

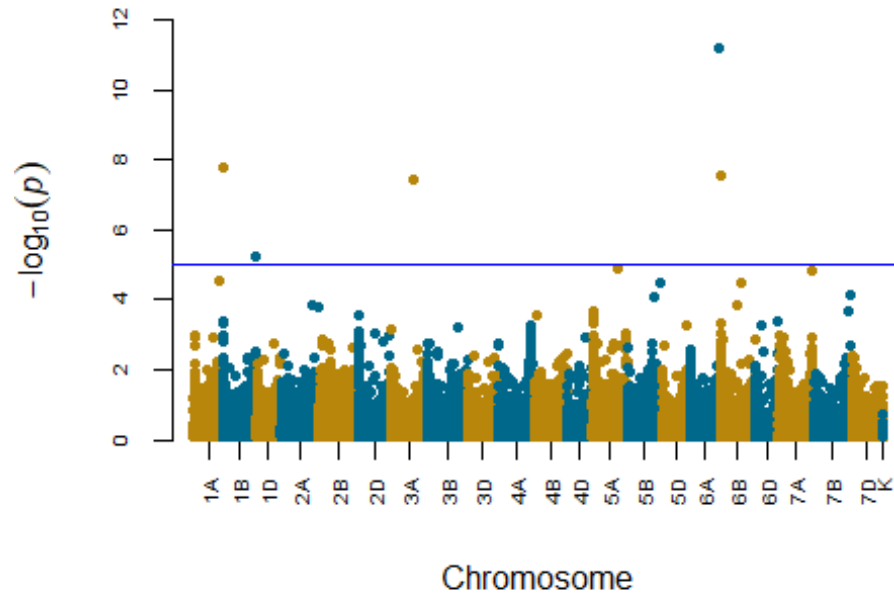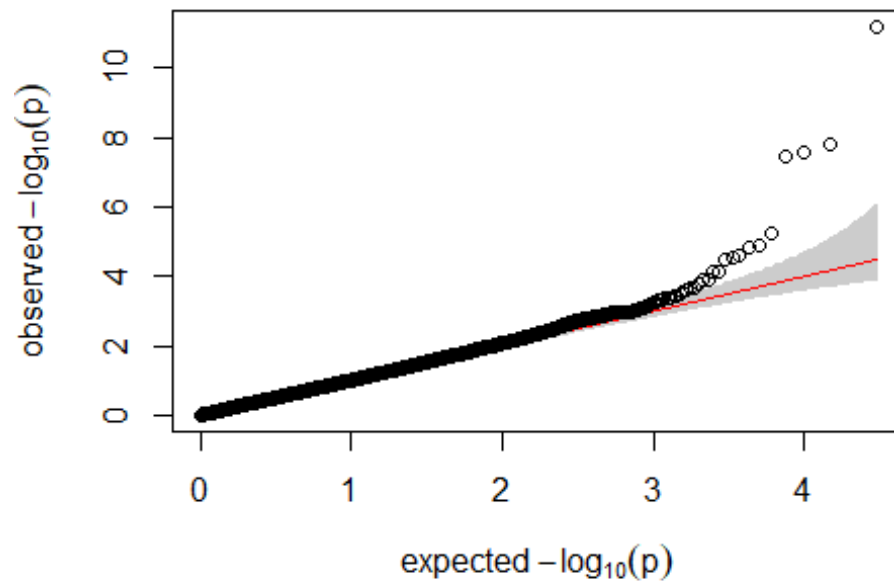

## Manhattan and QQ plots for trait YLD

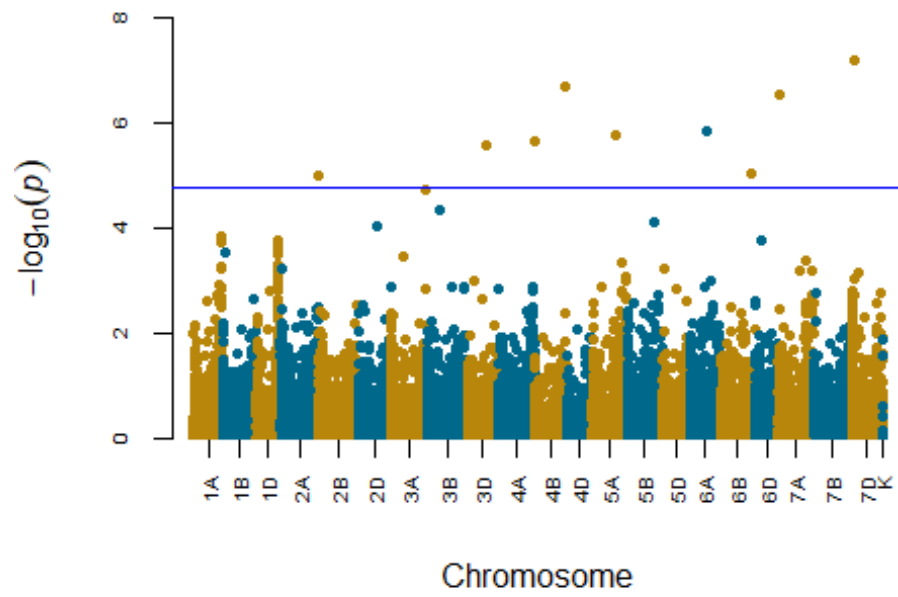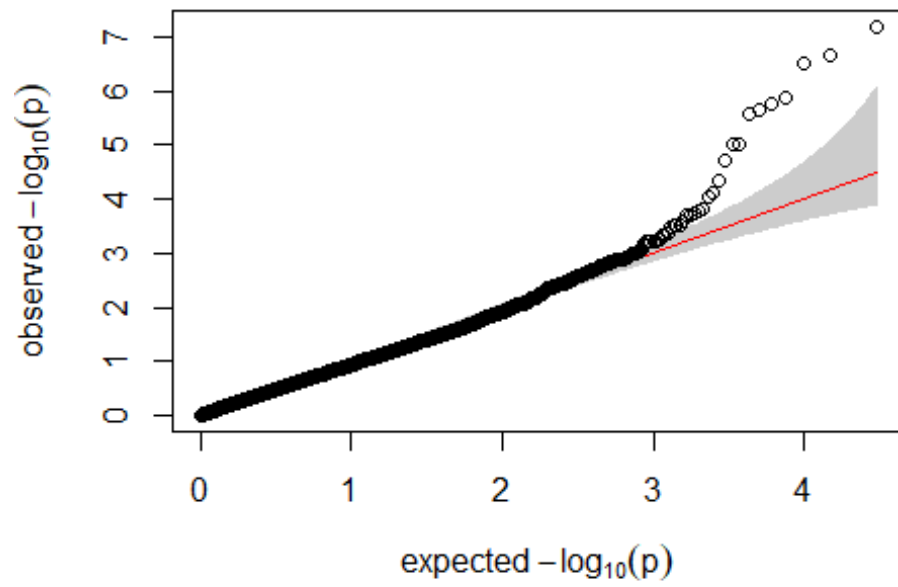

Supplement: pone.0208217.s009.pdf [file pone.0208217.s009.pdf]
